# Supplementary material for: Characterization of the Molecular Mechanisms of Resistance against DMI Fungicides in Cercospora beticola Populations from the Czech Republic
Source: MDPI journal article supplement (doi:10.3390/jof7121062), 2021-12-11
Supplement: s1 [file s1]

**Type of the Paper (Article)**

**Characterization of the molecular mechanisms of resistance against DMI fungicides in *Cercospora beticola* populations from the Czech Republic**

Ram Kumar<sup>1</sup>, Jana Mazakova<sup>1</sup>, Asad Ali<sup>1</sup>, Vishma Pratap Sur<sup>2</sup>, Madhab Kumar Sen<sup>3</sup>, Melvin D. Bolton<sup>4</sup>, Marie Manasova<sup>1</sup>, Pavel Rysanek<sup>1</sup>, Miloslav Zouhar<sup>1\*</sup>

<sup>1</sup>Department of Plant Protection, Faculty of Agrobiolgy, Food and Natural Resources, Czech University of Life Sciences Prague, Kamycka 129, 165 00, Prague 6, Suchdol, Czech Republic ; kumar@af.czu.cz (R.K.); mazakova@af.czu.cz (J.M.); aliasad@af.czu.cz (A.A.); manasova@af.czu.cz (M.M.); rysanek@af.czu.cz (P.R.)

<sup>2</sup>Laboratory of Reproductive Biology, Institute of Biotechnology of the Czech Academy of Sciences, BIOCEV, Prumyslova 595, 252 50 Vestec, Czech Republic; VishmaPratap.Sur@ibt.cas.cz

<sup>3</sup>Department of Agroecology and Crop Production, Faculty of Agrobiolgy, Food, and Natural Resources, Czech University of Life Sciences Prague, Kamycka 129, 165 00 Prague 6, Suchdol, Czech Republic; senm@af.czu.cz

<sup>4</sup>Northern Crop Science Laboratory, United States Department of Agriculture, 1307 18<sup>th</sup> St N, Fargo, ND, 58102, USA ; melvin.bolton@usda.gov

**\*Correspondence to:** [zouhar@af.czu.cz](mailto:zouhar@af.czu.cz)

**Supplementary Table S1.** Fungicide sensitivity of *Cercospora beticola* against three DMIs fungicides (propiconazole, prochloraz, and epoxiconazole). The EC<sub>50</sub> values are in (µg/mL).

| Isolates    | Propiconazole |                    | Prochloraz |                    | Epoxiconazole |                    |
|-------------|---------------|--------------------|------------|--------------------|---------------|--------------------|
|             | Average       | Standard deviation | Average    | Standard deviation | Average       | Standard deviation |
| 7B_1 (S3)   | 0.17          | 0.02               | 0.19       | 0.02               | 0.05          | 0.01               |
| 1_6 (S4)    | 0.05          | 0.01               | 0.32       | 0.22               | 0.45          | 0.32               |
| ST_8 (R2)   | 14.27         | 2.94               | 2.29       | 0.23               | 2.19          | 0.17               |
| 36_2 (R5)   | 5.43          | 0.54               | 44.01      | 5.85               | 2.78          | 0.13               |
| M61_5 (R10) | 3.11          | 0.14               | 4.36       | 0.42               | 39.53         | 6.23               |
| 7A_2        | 1.36          | 1.05               | 1.98       | 1.21               | 2.06          | 0.64               |
| 7A_3        | 1.22          | 0.04               | 2.06       | 0.56               | 1.14          | 0.93               |
| 7A_4        | 1.81          | 1.52               | 1.53       | 1.09               | 1.52          | 0.51               |
| 7A_5        | 1.29          | 0.59               | ND         | ND                 | 1.61          | 0.35               |
| 3_2         | 0.90          | 0.54               | 1.96       | 0.65               | 5.72          | 8.22               |
| 3_3         | 1.24          | 1.00               | 1.17       | 0.25               | 1.06          | 0.70               |
| 3_4         | 2.71          | 1.54               | 1.10       | 0.80               | ND            | ND                 |
| 3_5         | 0.62          | 0.54               | 0.47       | 0.37               | 1.18          | 0.34               |
| 4_2         | 1.84          | 0.92               | 1.48       | 0.22               | ND            | ND                 |
| 4_3         | 1.13          | 0.19               | 1.53       | 1.24               | 0.84          | 0.40               |
| 4_4         | 0.24          | 0.08               | 0.61       | 0.53               | 1.29          | 0.35               |
| 5_2         | 1.22          | 0.62               | 2.05       | 0.94               | 1.49          | 1.19               |
| 5_3         | 1.47          | 0.66               | 1.48       | 0.38               | 1.06          | 0.51               |
| 5_4         | 0.95          | 0.68               | 0.98       | 0.90               | 1.47          | 0.20               |
| 5_5         | 0.35          | 0.25               | 0.75       | 0.34               | 1.22          | 0.50               |
| vs_1        | 1.04          | 0.15               | 0.87       | 0.22               | 7.60          | 11.16              |
| vs_2        | 0.97          | 0.27               | ND         | ND                 | 3.99          | 3.46               |
| vs_3        | ND            | ND                 | 1.17       | 0.51               | 4.92          | 5.94               |
| 8_1         | ND            | ND                 | 2.39       | 1.29               | 2.37          | 1.06               |
| 8_2         | 1.06          | 0.37               | 2.68       | 1.51               | 1.24          | 0.37               |
| 8_3         | 1.04          | 0.12               | 1.45       | 0.96               | 1.20          | 0.79               |
| 9_1         | 2.03          | 0.90               | 0.98       | 0.57               | ND            | ND                 |
| 9_2         | 1.32          | 0.27               | 1.15       | 1.01               | 1.11          | 0.79               |
| 9_3         | 1.12          | 0.82               | 1.14       | 0.95               | 1.15          | 0.59               |
| 11_1        | 1.29          | 0.39               | 0.92       | 0.70               | 1.06          | 0.41               |
| 11_2        | ND            | ND                 | 2.80       | 1.44               | 1.43          | 0.73               |
| 11_3        | 1.30          | 0.40               | 1.50       | 1.32               | 1.88          | 0.15               |

|       |      |      |      |      |      |      |
|-------|------|------|------|------|------|------|
| 17_1  | 1.46 | 0.91 | 1.42 | 1.03 | 1.41 | 1.13 |
| 17_2  | 1.25 | 0.54 | 1.30 | 0.98 | 1.50 | 0.71 |
| 17_3  | 1.49 | 0.70 | 0.31 | 0.29 | 1.72 | 1.26 |
| 20_1  | ND   | ND   | 0.97 | 0.46 | 1.19 | 0.30 |
| 23_1  | 1.12 | 0.69 | 0.50 | 0.57 | 1.42 | 0.91 |
| 24_1  | 1.22 | 0.68 | 1.02 | 0.66 | 0.54 | 0.45 |
| 25_1  | 2.54 | 0.95 | 0.77 | 0.78 | 1.23 | 0.85 |
| 70_5  | 1.21 | 0.50 | 0.53 | 0.44 | 1.41 | 0.57 |
| 70_1  | 1.86 | 0.23 | 0.57 | 0.41 | 1.47 | 0.95 |
| 70_2  | 0.71 | 0.46 | ND   | ND   | 1.12 | 0.42 |
| 72_1  | 1.29 | 1.07 | 1.79 | 1.26 | 1.30 | 0.42 |
| 73_1  | 0.91 | 0.83 | 0.62 | 0.49 | 0.93 | 0.73 |
| E_1   | 1.91 | 0.77 | 1.47 | 1.98 | 0.50 | 0.38 |
| E_2   | 1.01 | 0.34 | 0.68 | 0.45 | 0.95 | 0.47 |
| E_3   | 1.02 | 0.26 | 0.80 | 0.91 | 0.57 | 0.46 |
| E_4   | 1.01 | 0.26 | 1.75 | 0.52 | 0.96 | 0.83 |
| E_5   | 0.89 | 0.92 | 1.35 | 0.49 | 0.91 | 0.64 |
| M61_1 | 0.97 | 0.56 | 0.83 | 0.95 | 1.13 | 0.72 |
| M61_2 | 0.88 | 0.49 | 1.48 | 0.43 | ND   | ND   |

#ND: “not done”.

#S: sensitive biotype

#R: resistant biotype

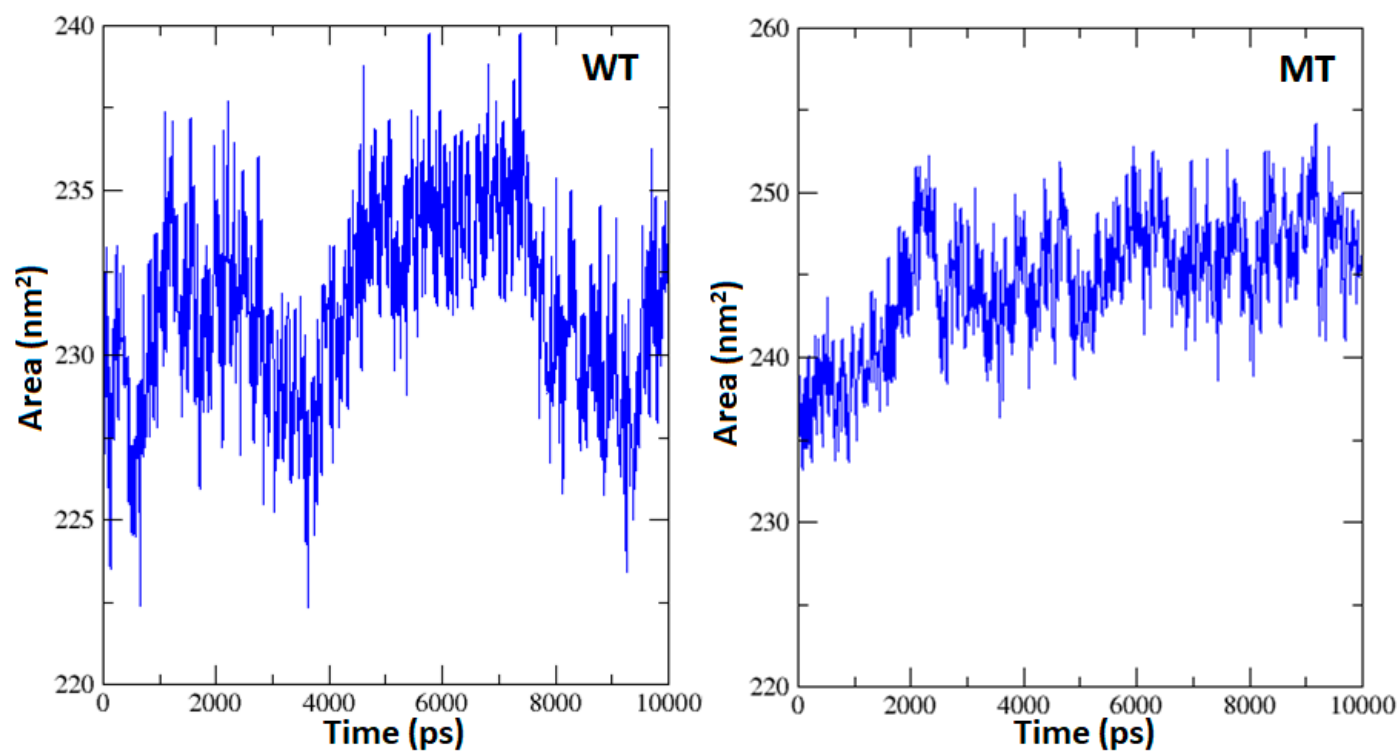

**Supplementary Figure S1.** Solvent accessible surface area analysis during propiconazole-*Cyp51* interaction between wild type (WT) genotype and mutant type (MT) genotype of *Cercospora beticola*.

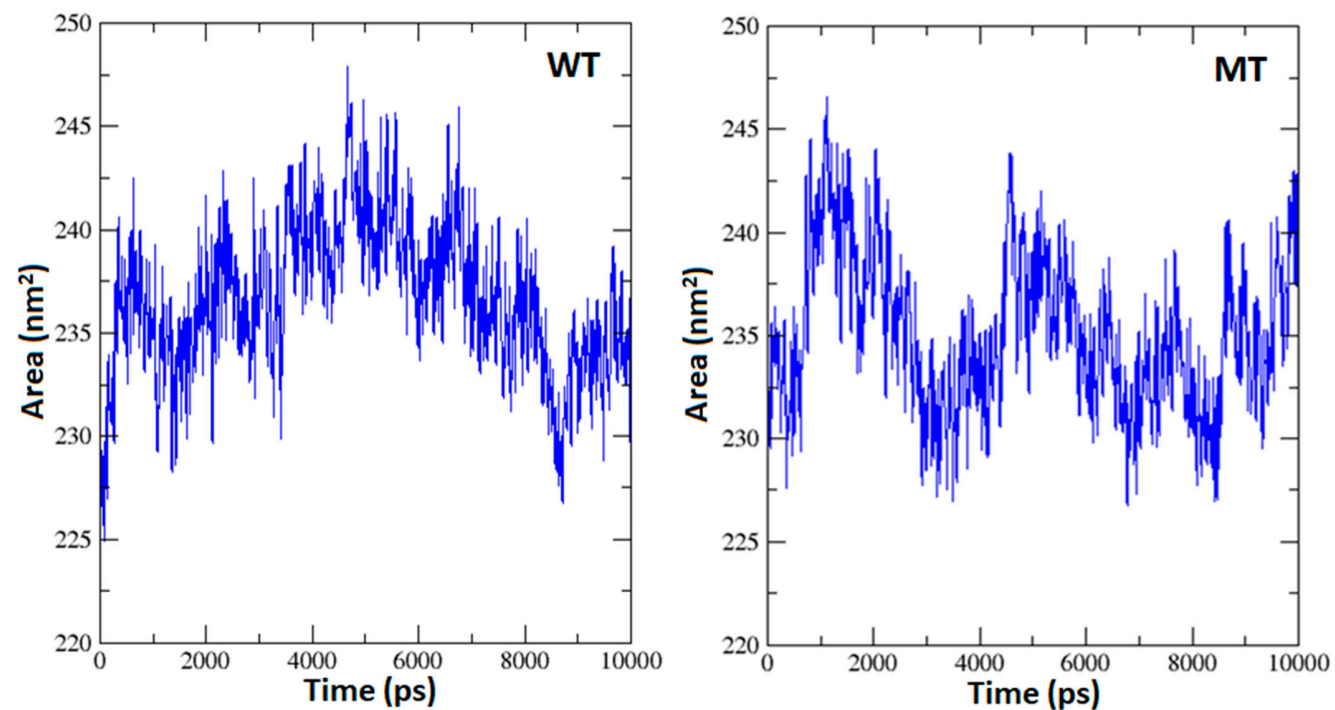

**Supplementary Figure S2.** Solvent accessible surface area analysis during prochloraz-*Cyp51* interaction between wild type (WT) genotype and mutant type (MT) genotype of *Cercospora beticola*.

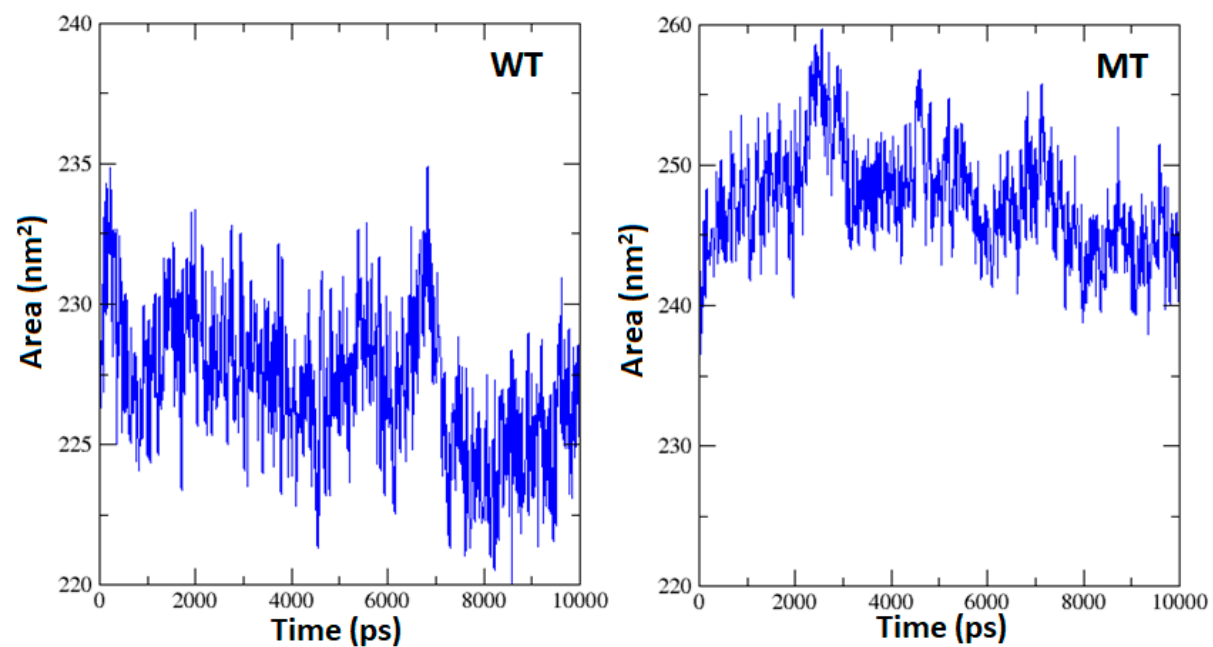

**Supplementary Figure S3.** Solvent accessible surface area analysis during epoxiconazole *Cyp51* interaction between wild type (WT) genotype and mutant type (MT) genotype of *Cercospora beticola*.

**Supplementary Table S2.** Lennard-Jones energies short-range (LJ-SR) and Coulombic potential within R-coulomb (Coul-SR) between *Cyp51* protein of *Cercospora beticola* and fungicide molecule, during MD simulations.

| <b>Propiconazole</b> |                                    |                        |                                    |                        |
|----------------------|------------------------------------|------------------------|------------------------------------|------------------------|
|                      | <b>Wild Type</b>                   |                        | <b>Mutant Type</b>                 |                        |
| <b>Energy type</b>   | <b>Interaction energy (kJ/mol)</b> | <b>Estimated error</b> | <b>Interaction energy (kJ/mol)</b> | <b>Estimated error</b> |
| Coul-SR              | -18.392                            | 1.6                    | -23.0891                           | 2.7                    |
| LJ-SR                | -162.367                           | 2.4                    | -144.432                           | 2.2                    |
| <b>Prochloraz</b>    |                                    |                        |                                    |                        |
|                      | <b>Wild Type</b>                   |                        | <b>Mutant Type</b>                 |                        |
| <b>Energy type</b>   | <b>Interaction energy (kJ/mol)</b> | <b>Estimated error</b> | <b>Interaction energy (kJ/mol)</b> | <b>Estimated error</b> |
| Coul-SR              | -18.5526                           | 1.5                    | -13.4189                           | 3.2                    |
| LJ-SR                | -140.738                           | 1                      | -121.644                           | 1.8                    |
| <b>Epoxiconazole</b> |                                    |                        |                                    |                        |
|                      | <b>Wild Type</b>                   |                        | <b>Mutant Type</b>                 |                        |
| <b>Energy type</b>   | <b>Interaction energy (kJ/mol)</b> | <b>Estimated error</b> | <b>Interaction energy (kJ/mol)</b> | <b>Estimated error</b> |
| Coul-SR              | -16.2723                           | 3.7                    | -7.09995                           | 1                      |
| LJ-SR                | -123.091                           | 3.1                    | -119.641                           | 1.3                    |

**Supplementary Table S3.** Analysis of gene expression variation of *Cyp51* gene of *Cercospora beticola*. The relative gene expression values are in terms of  $2^{-\Delta\Delta C_t}$  values. “\*” denotes significant at 5% significant level.

| Isolates | Propiconazole           |                              |                                      |             |
|----------|-------------------------|------------------------------|--------------------------------------|-------------|
|          | Constitutive expression | Fungicide-induced expression | Significant at 5% significance level | Fold change |
| S3       | 0.96 ( $\pm$ 0.03)      | 0.96 ( $\pm$ 0.34)           | NS                                   | NA          |
| S4       | 1.28 ( $\pm$ 0.25)      | 1.23 ( $\pm$ 0.11)           | NS                                   | NA          |
| R2       | 1.04 ( $\pm$ 0.11)      | 3.35( $\pm$ 0.38)            | *                                    | 3.21        |
| Isolates | Prochloraz              |                              |                                      |             |
|          | Constitutive expression | Fungicide-induced expression | Significant at 5% significance level | Fold change |
| S3       | 0.96 ( $\pm$ 0.03)      | 1.17 ( $\pm$ 0.32)           | NS                                   | NA          |
| S4       | 1.28 ( $\pm$ 0.25)      | 1.84 ( $\pm$ 0.36)           | NS                                   | NA          |
| R5       | 1.07 ( $\pm$ 0.17)      | 4.98 ( $\pm$ 0.64)           | *                                    | 4.67        |
| Isolates | Epoiconazole            |                              |                                      |             |
|          | Constitutive expression | Fungicide-induced expression | Significant at 5% significance level | Fold change |
| S3       | 0.96 ( $\pm$ 0.03)      | 1.56 ( $\pm$ 0.56)           | NS                                   | NA          |
| S4       | 1.28 ( $\pm$ 0.25)      | 1.49 ( $\pm$ 0.08)           | NS                                   | NA          |
| R10      | 0.95 ( $\pm$ 0.09)      | 3.25 ( $\pm$ 0.67)           | *                                    | 3.43        |

#NS: “non-significant”

#NA: “not applicable”

#S: sensitive biotype

#R: resistant biotype
